# Supplementary material for: N-Donor flexible ligands for constructing polyoxometalate-based metal–organic frameworks as multifunctional electrocatalysts
Source: Royal Society of Chemistry journal article supplement (doi:10.1039/d2ce00077f), 2022-01-01
Supplement: d2ce00077f1.pdf [file d2ce00077f1.pdf]

## Electronic Supplementary Information (ESI)

N-donor flexible ligands constructed polyoxometalate-based metal-organic frameworks as multifunctional electrocatalysts

Qian Zhou, Jin-Zhen Yao, Jing Sun,\* Xiao Li,\* Zhong-Min Su\*

<sup>a</sup> School of Chemistry and Environmental Engineering, Changchun University of Science and Technology; Jilin Provincial Science and Technology Innovation Center of Optical Materials and Chemistry; Jilin Provincial International Joint Research Center of Photofunctional Materials and Chemistry; Changchun 130022, China.

\* Corresponding author. Tel.: 0431-85583894.

E-mail address: sj-cust@126.com; lix@cust.edu.cn; zmsu@nenu.edu.cn

### 1. Experimental section

#### 1.1. Materials and general methods

All chemicals were commercially purchased and used without purification. Crystal data were collected using a Bruker APEX II CCD diffractometer in Germany. Powder X-ray diffraction (PXRD) patterns were measured on a powder X-ray diffractometer (DRIC Y-2000) using Cu K $\alpha$  radiation. EVO2G-TG-08 analyzer was used for testing under air at a heating rate of 10 °C/min. FT-IR spectra were recorded from KBr pellets from 4000-500 cm<sup>-1</sup> with a Nicolet Magna750 spectrometer. CHI760E electrochemical workstation was used for control of the electrochemical measurements and data collection. A conventional three-electrode system was used, with a carbon paste electrode (CPE) as a working electrode, a commercial Ag/AgCl as reference electrode and graphite carbon as counter electrode.

#### 1.2. Synthesis of CUST-631 and CUST-632

A mixture of Ni(NO<sub>3</sub>)<sub>2</sub>·6H<sub>2</sub>O (0.06 g, 0.21 mmol), H<sub>4</sub>SiW<sub>12</sub>O<sub>40</sub>·xH<sub>2</sub>O (0.06 g, 0.02 mmol), btbu (0.20 mmol) and 8 mL H<sub>2</sub>O under ultrasonic treatment at room temperature for 30 min, then several drops of HNO<sub>3</sub> were added and stirred evenly. This mixture was transferred to a 25 mL Teflon-lined reactor 130 °C for 3 days. After the reactor was slowly cooled to room temperature, green block crystals of **CUST-631** were obtained. The crystals were picked out, washed and dried at room temperature (62% yield based on W). The CCDC number of **CUST-631** is 2132631. Anal. Calcd. for **CUST-631**: H, 0.05; C, 10.08; N, 8.82; O,

19.33, Ni, 3.08; Si, 0.74, W, 57.93 (%). Found: H, 0.07; C, 10.04; N, 8.72; O, 19.35, Ni, 3.05; Si, 0.76, W, 58.01 (%).

**CUST-632** was prepared similarly to **CUST-631**, a mixture of  $\text{Co}(\text{NO}_3)_2 \cdot 6\text{H}_2\text{O}$  (0.06 g, 0.34 mmol),  $\text{H}_4\text{SiW}_{12}\text{O}_{40} \cdot x\text{H}_2\text{O}$  (0.06 g, 0.02 mmol), btbu (0.20 mmol) and 8 mL  $\text{H}_2\text{O}$  under ultrasonic treatment at room temperature for 30 min, then several drops of  $\text{HNO}_3$  were added. After the reactor was slowly cooled to room temperature, red block crystals of **CUST-632** were obtained (65 yield based on W). The CCDC number of **CUST-632** is 2132630. Anal. Calcd. for **CUST-632**: H, 0.02; C, 9.79; N, 8.85; O, 19.39, Co, 3.10; Si, 0.74, W, 58.11 (%). Found: H, 0.05; C, 9.81; N, 8.81; O, 19.33, Co, 3.08; Si, 0.76, W, 58.16 (%).

### 1.3. Preparation of CPEs

Carbon paste electrodes (CPEs) were fabricated as follows: First, suitable proportions of **CUST-631** or **CUST-632** with acetylene black were weighed and grinded for 30 minutes. Then, electrocatalyst inks were prepared by dispersing the mixture in deionized water, ethanol, and 5 wt % Nafion solution by ultra sonication for at least 30 min. 5  $\mu\text{L}$  of the ink was dropped on the surface of precleaned glassy carbon electrode and dried in air.

### 1.4 Theoretical support

The reactions associated with reduction of  $[\alpha\text{-SiW}_{12}\text{O}_{40}]^{4-}$  in concentrated  $\text{H}_2\text{SO}_4$  are represented.

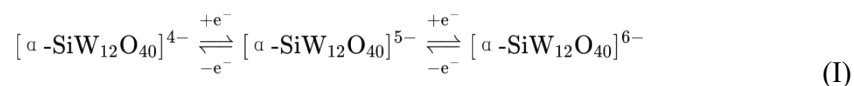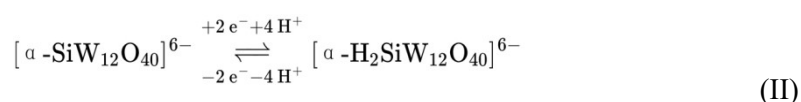

Take the reduction of nitrite as an example,  $\text{HNO}_2$  can disproportionate to form  $\text{NO}$  and  $\text{NO}_3^-$ , then  $[\alpha\text{-SiW}_{12}\text{O}_{40}]^{5-}$  is oxidized by  $\text{HNO}_2$  in sulfuric acid media to reform  $[\alpha\text{-SiW}_{12}\text{O}_{40}]^{4-}$ ,

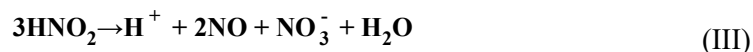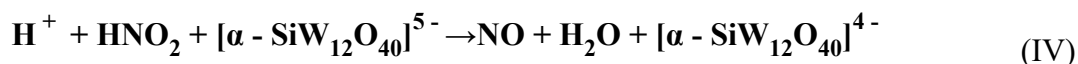

Table S1. Crystal data and structure refinement for CUST-631.

|                                             |                                                                                                   |
|---------------------------------------------|---------------------------------------------------------------------------------------------------|
| Empirical formula                           | C <sub>32</sub> H <sub>54</sub> N <sub>24</sub> Ni <sub>2</sub> O <sub>42</sub> SiW <sub>12</sub> |
| Formula weight                              | 3798.70                                                                                           |
| Temperature/K                               | 296.15                                                                                            |
| Crystal system                              | monoclinic                                                                                        |
| Space group                                 | <i>P2<sub>1</sub>/n</i>                                                                           |
| a/Å                                         | 12.438(2)                                                                                         |
| b/Å                                         | 16.716(3)                                                                                         |
| c/Å                                         | 17.383(3)                                                                                         |
| $\alpha$ /°                                 | 90                                                                                                |
| $\beta$ /°                                  | 102.122(3)                                                                                        |
| $\gamma$ /°                                 | 90                                                                                                |
| Volume/Å <sup>3</sup>                       | 3533.7(12)                                                                                        |
| Z                                           | 2                                                                                                 |
| density (calculated)                        | 3.570 g/cm <sup>3</sup>                                                                           |
| absorption coefficient                      | 20.086 mm <sup>-1</sup>                                                                           |
| F(000)                                      | 3416.0                                                                                            |
| 2 $\theta$ range for data collection/°      | 3.418 to 50.216                                                                                   |
| Index ranges                                | -14 ≤ h ≤ 14, -16 ≤ k ≤ 19, -20 ≤ l ≤ 20                                                          |
| Reflections collected                       | 20127                                                                                             |
| Independent reflections                     | 6274 [R <sub>int</sub> = 0.0438, R <sub>sigma</sub> = 0.0459]                                     |
| Data/restraints/parameters                  | 6274/210/530                                                                                      |
| Goodness-of-fit on F <sup>2</sup>           | 1.254                                                                                             |
| R <sub>1</sub> [I ≥ 2σ(I)] <sup>a</sup>     | 0.0578                                                                                            |
| wR <sub>2</sub> [I ≥ 2σ(I)] <sup>b</sup>    | 0.1084                                                                                            |
| R <sub>1</sub> [all data] <sup>a</sup>      | 0.0690                                                                                            |
| wR <sub>2</sub> [all data] <sup>b</sup>     | 0.1119                                                                                            |
| Largest diff. peak/hole / e Å <sup>-3</sup> | 2.14/-1.60                                                                                        |

$$^a R_1 = \sum ||F_o| - |F_c|| / \sum |F_o|. \quad ^b wR_2 = [\sum w(F_o^2 - F_c^2)^2 / \sum w(F_o^2)^2]^{1/2}$$

Table S2. Bond Lengths for CUST-631.

| Atom | Atom | Length/Å  | Atom | Atom | Length/Å  |
|------|------|-----------|------|------|-----------|
| Ni1  | N1   | 2.100(16) | W4   | O2   | 1.685(11) |

|                       |           |                     |           |
|-----------------------|-----------|---------------------|-----------|
| Ni1-O1                | 2.133(14) | W4-O5               | 1.885(17) |
| Ni1-N2                | 2.080(17) | W4-O9               | 1.854(18) |
| Ni1-N3                | 2.103(16) | W4-O10              | 1.898(14) |
| Ni1-O2                | 2.177(12) | W4-O17              | 2.41(2)   |
| Ni1-N8                | 2.077(15) | W4-O18              | 2.34(2)   |
| Si08-O17 <sup>1</sup> | 1.61(2)   | W4-O23              | 1.912(17) |
| Si08-O18              | 1.67(2)   | W5-O5               | 1.916(15) |
| Si08-O20              | 1.608(19) | W5-O11 <sup>1</sup> | 1.917(15) |
| Si08-O21 <sup>1</sup> | 1.59(2)   | W5-O13              | 1.913(17) |
| W3-O3                 | 1.861(16) | W5-O16              | 1.664(14) |
| W3-O7                 | 1.639(14) | W5-O18              | 2.40(2)   |
| W3-O9                 | 1.927(15) | W5-O20 <sup>1</sup> | 2.44(2)   |
| W3-O14 <sup>1</sup>   | 1.892(15) | W5-O22              | 1.866(16) |
| W3-O15                | 1.864(17) | W6-O3 <sup>1</sup>  | 1.926(15) |
| W3-O17                | 2.38(2)   | W6-O8               | 1.889(16) |
| W3-O21 <sup>1</sup>   | 2.41(2)   | W6-O18              | 2.38(2)   |
| W1-O6                 | 1.653(14) | W6-O19              | 1.671(14) |
| W1-O8                 | 1.926(15) | W6-O21              | 2.43(2)   |
| W1-O12                | 1.869(15) | W6-O22              | 1.914(16) |
| W1-O13 <sup>1</sup>   | 1.866(16) | W6-O23              | 1.881(16) |
| W1-O14                | 1.866(14) | W2-O4               | 1.669(13) |
| W1-O20                | 2.36(2)   | W2-O10              | 1.879(15) |
| W1-O21                | 2.39(2)   | W2-O11              | 1.878(15) |
|                       |           | W2-O12              | 1.894(15) |
|                       |           | W2-O15              | 1.933(18) |
|                       |           | W2-O17              | 2.38(2)   |
|                       |           | W2-O20              | 2.412(19) |

<sup>1</sup>1-X,1-Y,1-Z; <sup>2</sup>5/2-X,-1/2+Y,1/2-Z; <sup>3</sup>-1/2+X,3/2-Y,-1/2+Z

Table S3. Bond Angles for CUST-631.

| Atom Atom Atom | Angle/° | Atom Atom Atom                          | Angle/°   |
|----------------|---------|-----------------------------------------|-----------|
| N1-Ni1-O1      | 85.1(6) | O17 <sup>1</sup> -Si08-O20              | 109.3(10) |
| N1-Ni1-N3      | 91.2(6) | O17 <sup>1</sup> -Si08-O20 <sup>1</sup> | 70.7(10)  |

|                                         |           |                                         |           |
|-----------------------------------------|-----------|-----------------------------------------|-----------|
| N1-Ni1-O2                               | 86.7(6)   | O17-Si08-O20 <sup>1</sup>               | 109.3(10) |
| O1-Ni1-O2                               | 83.5(5)   | O18-Si08-O18 <sup>1</sup>               | 180.0(16) |
| N2-Ni1-N1                               | 100.5(6)  | O20 <sup>1</sup> -Si08-O18 <sup>1</sup> | 107.5(11) |
| N2-Ni1-O1                               | 169.6(6)  | O20-Si08-O18 <sup>1</sup>               | 72.5(11)  |
| N2-Ni1-N3                               | 92.8(7)   | O20-Si08-O18                            | 107.5(11) |
| N2-Ni1-O2                               | 88.1(6)   | O20-Si08-O20 <sup>1</sup>               | 180.0     |
| N3-Ni1-O1                               | 95.8(6)   | O21-Si08-O17 <sup>1</sup>               | 71.0(11)  |
| N3-Ni1-O2                               | 177.8(6)  | O21-Si08-O17                            | 109.0(11) |
| N8-Ni1-N1                               | 167.0(6)  | O21 <sup>1</sup> -Si08-O18              | 109.4(11) |
| N8-Ni1-O1                               | 82.3(6)   | O21-Si08-O18                            | 70.6(11)  |
| N8-Ni1-N2                               | 91.4(6)   | O21 <sup>1</sup> -Si08-O20 <sup>1</sup> | 67.6(10)  |
| N8-Ni1-N3                               | 93.4(6)   | O21-Si08-O20 <sup>1</sup>               | 112.4(10) |
| N8-Ni1-O2                               | 88.5(6)   | O21 <sup>1</sup> -Si08-O21              | 180.0     |
| O17 <sup>1</sup> -Si08-O17              | 180.0     |                                         |           |
| O17 <sup>1</sup> -Si08-O18              | 109.2(11) |                                         |           |
| O17 <sup>1</sup> -Si08-O18 <sup>1</sup> | 70.8(11)  |                                         |           |

<sup>1</sup>1-X,1-Y,1-Z;<sup>2</sup>5/2-X,-1/2+Y,1/2-Z;<sup>3</sup>-1/2+X,3/2-Y,-1/2+Z;<sup>4</sup>1/2+X,3/2-Y,1/2+Z

Table S4. Crystal data and structure refinement for CUST-632.

| Empirical formula     | C <sub>32</sub> H <sub>52</sub> N <sub>24</sub> Co <sub>2</sub> O <sub>42</sub> SiW <sub>12</sub> |
|-----------------------|---------------------------------------------------------------------------------------------------|
| Formula weight        | 3797.12                                                                                           |
| Temperature/K         | 296.15                                                                                            |
| Crystal system        | monoclinic                                                                                        |
| Space group           | <i>P2<sub>1</sub>/n</i>                                                                           |
| a/Å                   | 12.407(10)                                                                                        |
| b/Å                   | 16.723(13)                                                                                        |
| c/Å                   | 17.478(14)                                                                                        |
| α/°                   | 90                                                                                                |
| β/°                   | 102.562(14)                                                                                       |
| γ/°                   | 90                                                                                                |
| Volume/Å <sup>3</sup> | 3540(5)                                                                                           |
| Z                     | 2                                                                                                 |

|                                                  |                                                                        |
|--------------------------------------------------|------------------------------------------------------------------------|
| density (calculated)                             | 3.563 g/cm <sup>3</sup>                                                |
| absorption coefficient                           | 19.990 mm <sup>-1</sup>                                                |
| F(000)                                           | 3408.0                                                                 |
| 2 $\Theta$ range for data collection/ $^{\circ}$ | 3.41 to 50.814                                                         |
| Index ranges                                     | -14 $\leq$ h $\leq$ 14, -19 $\leq$ k $\leq$ 12, -20 $\leq$ l $\leq$ 21 |
| Reflections collected                            | 20195                                                                  |
| Independent reflections                          | 6391 [ $R_{\text{int}} = 0.0650$ , $R_{\text{sigma}} = 0.0687$ ]       |
| Data/restraints/parameters                       | 6391/617/548                                                           |
| Goodness-of-fit on $F^2$                         | 1.168                                                                  |
| $R_1$ [ $I \geq 2\sigma(I)$ ] <sup>a</sup>       | 0.0672                                                                 |
| $wR_2$ [ $I \geq 2\sigma(I)$ ] <sup>b</sup>      | 0.1322                                                                 |
| $R_1$ [all data] <sup>a</sup>                    | 0.0829                                                                 |
| $wR_2$ [all data] <sup>b</sup>                   | 0.1386                                                                 |
| Largest diff. peak/hole / e $\text{\AA}^{-3}$    | 1.89/-1.78                                                             |

$$^a R_1 = \frac{\sum ||F_o| - |F_c||}{\sum |F_o|}, \quad ^b wR_2 = \frac{[\sum w(F_o^2 - F_c^2)^2 / \sum w(F_o^2)^2]^{1/2}}$$

Table S5. Bond Lengths for CUST-632.

| Atom                 | Atom | Length/ $\text{\AA}$ | Atom                | Atom | Length/ $\text{\AA}$ |
|----------------------|------|----------------------|---------------------|------|----------------------|
| Co07-O1              |      | 2.220(17)            | W3-O18              |      | 1.673(17)            |
| Co07-O4              |      | 2.168(15)            | W3-O22              |      | 1.878(17)            |
| Co07-N1              |      | 2.116(18)            | W3-O2               |      | 2.42(3)              |
| Co07-N2              |      | 2.11(2)              | W3-O9 <sup>1</sup>  |      | 2.41(3)              |
| Co07-N3              |      | 2.15(2)              | W3-O11              |      | 1.928(17)            |
| Co07-N4              |      | 2.135(19)            | W4-O10              |      | 1.915(17)            |
| Si1-O2               |      | 1.60(3)              | W4-O12              |      | 1.847(16)            |
| Si1-O9 <sup>1</sup>  |      | 1.61(3)              | W4-O23              |      | 1.942(17)            |
| Si1-O5               |      | 1.59(3)              | W4-O17              |      | 1.669(16)            |
| Si1-O21 <sup>1</sup> |      | 1.63(3)              | W4-O9               |      | 2.41(3)              |
| W1-O6 <sup>1</sup>   |      | 1.878(18)            | W4-O21 <sup>1</sup> |      | 2.40(3)              |
| W1-O10               |      | 1.846(17)            | W4-O11 <sup>1</sup> |      | 1.883(19)            |
| W1-O3 <sup>1</sup>   |      | 1.920(17)            | W5-O8               |      | 1.656(15)            |
| W1-O13               |      | 1.859(17)            | W5-O14              |      | 1.905(17)            |

|                     |           |                     |           |
|---------------------|-----------|---------------------|-----------|
| W1-O7               | 1.647(16) | W5-O20              | 1.895(17) |
| W1-O9               | 2.38(3)   | W5-O13              | 1.951(18) |
| W1-O5 <sup>1</sup>  | 2.40(3)   | W5-O15              | 1.871(17) |
| W2-O1               | 1.669(15) | W5-O2               | 2.38(3)   |
| W2-O12              | 1.961(17) | W5-O5 <sup>1</sup>  | 2.42(3)   |
| W2-O16              | 1.864(16) | W6-O16              | 1.901(17) |
| W2-O3               | 1.851(17) | W6-O20              | 1.860(17) |
| W2-O15 <sup>1</sup> | 1.901(16) | W6-O22              | 1.888(18) |
| W2-O5               | 2.37(3)   | W6-O23              | 1.868(18) |
| W2-O21 <sup>1</sup> | 2.37(3)   | W6-O2               | 2.42(3)   |
| W3-O6               | 1.864(17) | W6-O19              | 1.651(16) |
| W3-O14              | 1.861(17) | W6-O21 <sup>1</sup> | 2.41(3)   |

<sup>1</sup>1-X,1-Y,1-Z; <sup>2</sup>1/2+X,3/2-Y,1/2+Z; <sup>3</sup>-1/2-X,-1/2+Y,3/2-Z

Table S6. Bond Angles for CUST-632.

| Atom Atom Atom          | Angle/°   | Atom Atom Atom                       | Angle/°   |
|-------------------------|-----------|--------------------------------------|-----------|
| O4-Co07-O1              | 81.2(6)   | O2 <sup>1</sup> -Si1-O21             | 70.9(15)  |
| N1-Co07-O1              | 87.2(7)   | O21-Si1-O21 <sup>1</sup>             | 180.0     |
| N1-Co07-O4              | 84.1(7)   | O9-Si1-O9 <sup>1</sup>               | 180.0     |
| N1-Co07-N3              | 91.7(8)   | O9 <sup>1</sup> -Si1-O21             | 70.2(15)  |
| N1-Co07-N4              | 165.9(8)  | O9-Si1-O21                           | 109.8(15) |
| N2-Co07-O1              | 87.8(7)   | O9-Si1-O21 <sup>1</sup>              | 70.1(18)  |
| N2-Co07-O4              | 166.7(7)  | O5 <sup>1</sup> -Si1-O2 <sup>1</sup> | 109.2(17) |
| N2-Co07-N1              | 103.0(8)  | O5 <sup>1</sup> -Si1-O2              | 70.8(17)  |
| N2-Co07-N3              | 93.4(8)   | O5-Si1-O9                            | 109.4(16) |
| N2-Co07-N4              | 90.1(7)   | O5 <sup>1</sup> -Si1-O9              | 70.6(16)  |
| N3-Co07-O1              | 178.6(7)  | O5 <sup>1</sup> -Si1-O5              | 180.0(13) |
| N3-Co07-O4              | 97.8(7)   | O5-Si1-O21                           | 110.4(15) |
| N4-Co07-O1              | 87.9(7)   | O5 <sup>1</sup> -Si1-O21             | 69.6(15)  |
| N4-Co07-O4              | 82.1(7)   |                                      |           |
| N4-Co07-N3              | 93.0(8)   |                                      |           |
| O2 <sup>1</sup> -Si1-O2 | 180.0     |                                      |           |
| O2-Si1-O9               | 109.0(16) |                                      |           |

|                         |           |
|-------------------------|-----------|
| O2 <sup>1</sup> -Si1-O9 | 71.0(16)  |
| O2-Si1-O21              | 109.1(15) |

---

$^11-X, 1-Y, 1-Z; ^21/2+X, 3/2-Y, 1/2+Z; ^3-1/2+X, 3/2-Y, -1/2+Z; ^4-1/2-X, -1/2+Y, 3/2-Z; ^5-1/2-X, 1/2+Y, 3/2-Z$

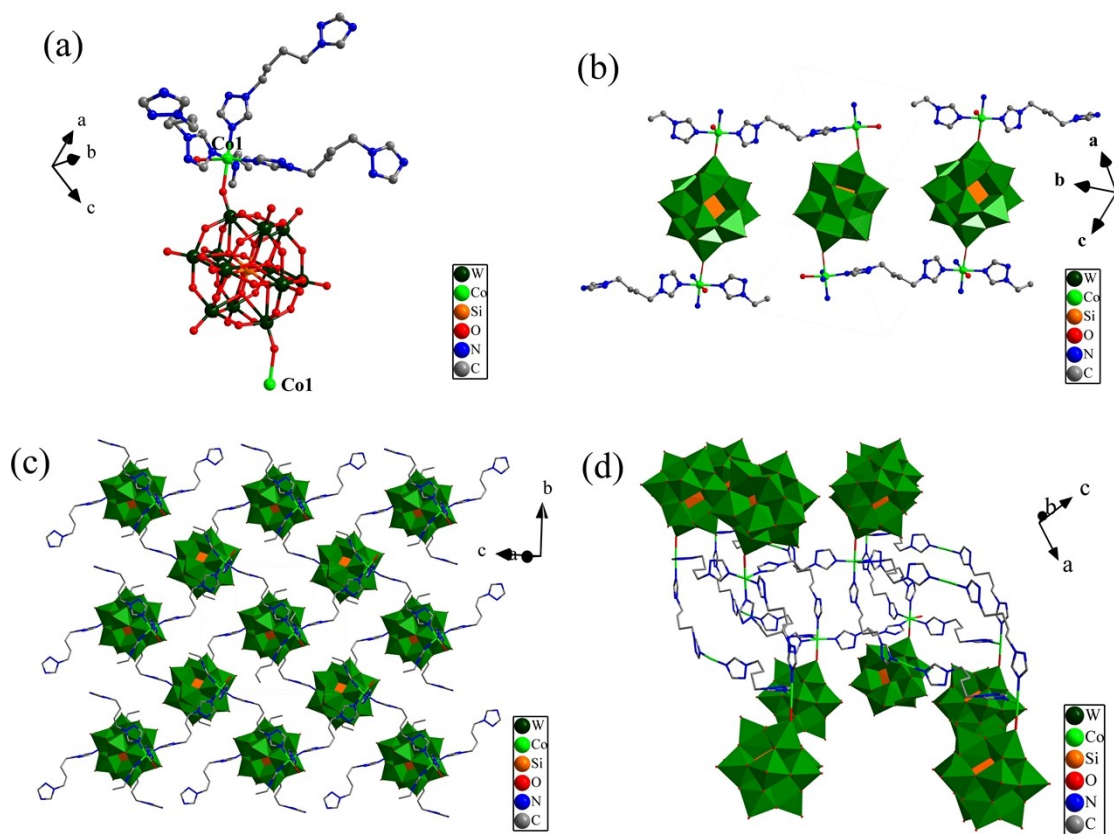

Figure S1 (a) Asymmetric unit of CUST-632. (All hydrogens are omitted for clarity); (b) The 1D Co- $\{SiW_{12}\}$  inorganic chain of CUST-632; (c) The  $\{SiW_{12}\}$ -based 2D network of CUST-632 along a-axis; (d) The diagram of the 3D fabric of CUST-632.

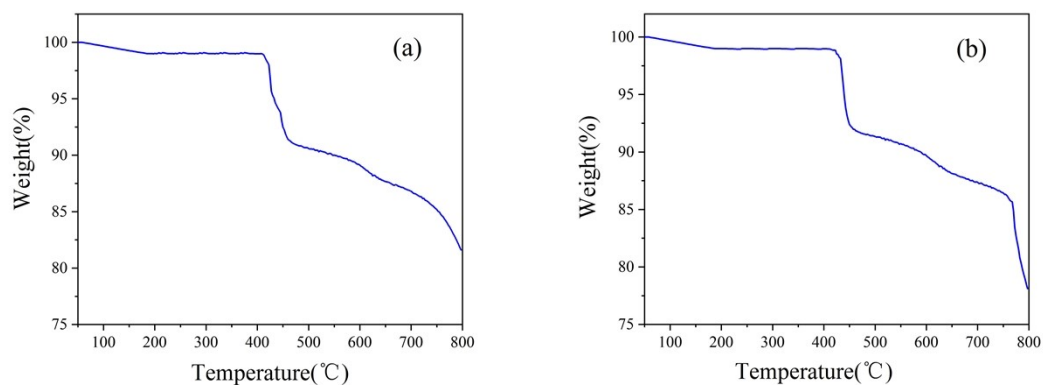

Figure S2 TG curves of (a) CUST-631 and (b) CUST-632.



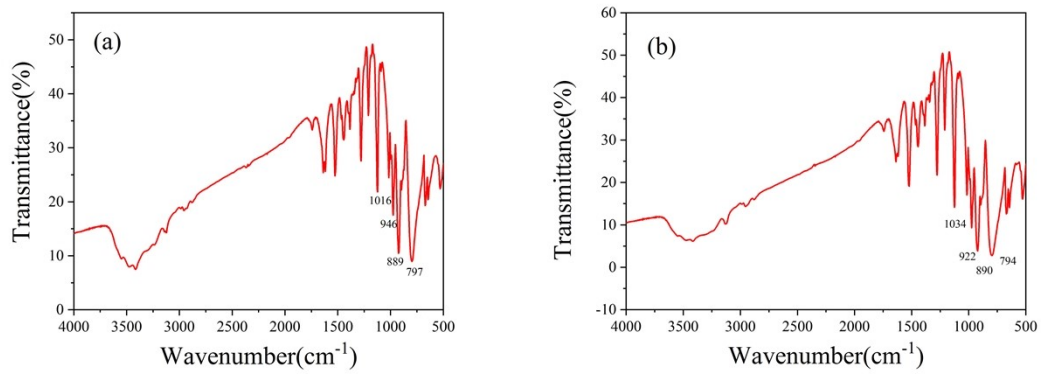

Figure S3 IR spectra of (a) CUST-631 and (b) CUST-632.

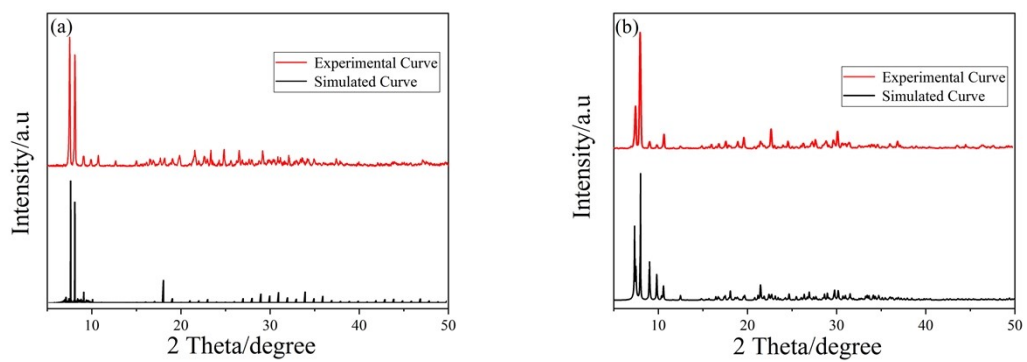

Figure S4 The PXRD patterns of (a) CUST-631 and (b) CUST-632.

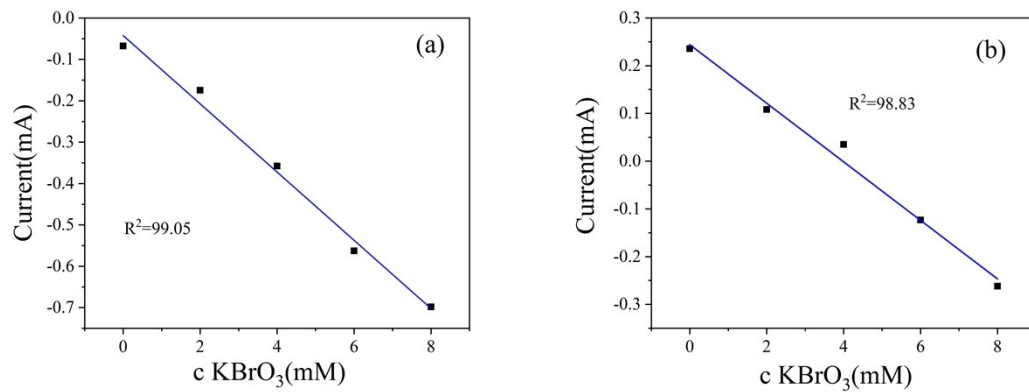

Figure S5 The plot of the cathodic peak currents vs. concentrations of KBrO<sub>3</sub> of (a) CUST-631 and (b) CUST-632.

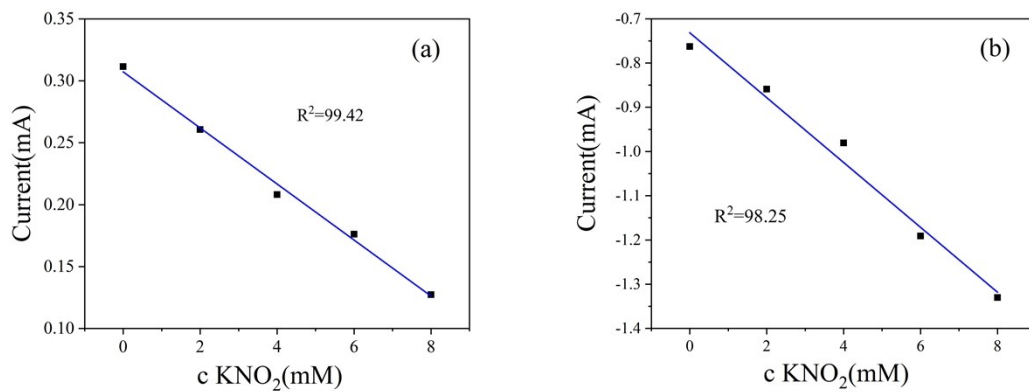

Figure S6 The plot of the cathodic peak currents vs. concentrations of  $\text{KNO}_2$  of (a) CUST-631 and (b) CUST-632.

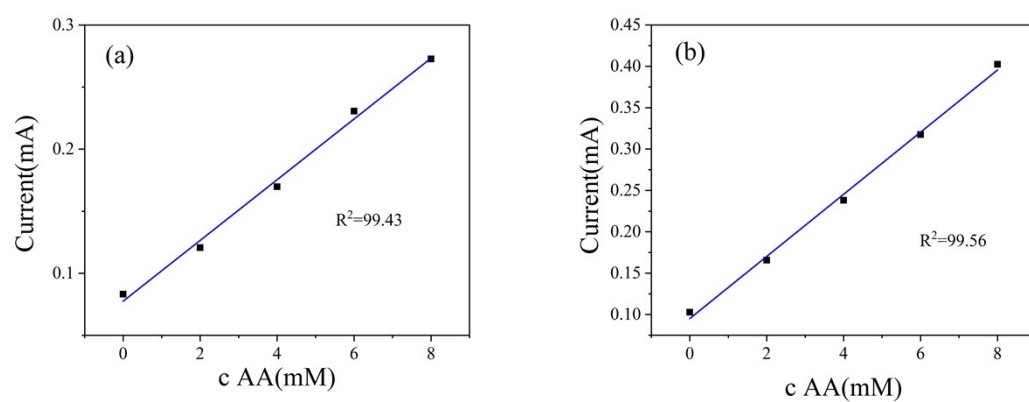

Figure S7 The plot of the anodic peak currents vs. concentrations of AA of (a) CUST-631 and (b) CUST-632.
